# Supplementary material
Source: PubMed Central journal article supplement (PMC4026580)
Supplement: supp_JCO.2013.53.2630_Questionnaire_JCO.2013.53.2630.pdf [file supp_JCO.2013.53.2630_Questionnaire_JCO.2013.53.2630.pdf]

**Doxepin Rinse Versus Placebo in the Treatment of Acute Oral Mucositis Pain in Patients Receiving Head and Neck Radiotherapy With or Without Chemotherapy: A Phase III, Randomized Double-blind Trial (NCCTG N09C6 [Alliance])**

**Leenstra, et al.**



No  
drowsiness

Extreme drowsiness,  
leading to sleep

**6. Have you noticed any other side effects from the oral rinse? (circle 'No' or 'Yes')**  
**No Yes**

If yes, please explain

---

---

---

**After 15 minutes from the time you rinsed your mouth (10 minutes from now), please complete the next questionnaire page.**
